# Supplementary material for: Exploring the redox reactivity of magnesium porphine. Insight into the origins of electropolymerisation
Source: Royal Society of Chemistry journal article supplement (doi:10.1039/b914916c), 2010-01-01

## Electronic Supplementary Information

### Exploring the redox reactivity of magnesium porphine. Insight into the origins of electropolymerisation

Charles H. Devillers,\* Dominique Lucas,\* Abdou K. D. Dime, Yoann Rousselin and Yves Mugnier

*Institut de Chimie Moléculaire de l'Université de Bourgogne,  
Université de Bourgogne, CNRS UMR 5260,  
9 avenue Alain Savary, 21078 Dijon Cedex, France*

During an attempt to isolate and characterise the different oligomers, we have isolated a small fraction of a yellow product, which seems to be pure according to TLC analysis. Its UV-visible spectrum (S1) is very similar to those described for *meso-meso* free-base and Zn porphyrin dimers. The Maldi-Tof spectrum (S2) of this fraction reveals a major peak corresponding to the (MgP)<sub>2</sub> dimers. Unluckily, the insufficient quantity of isolated product precluded any NMR analysis.

- S1:** UV-visible spectroscopy characterisation of (MgP)<sub>2</sub> dimer in dichloromethane
- S2:** Maldi-Tof mass spectrometry characterisation measured on the sample issued from the UV-visible analysis

**S1: UV-visible spectroscopy characterisation of (MgP)<sub>2</sub> dimer in dichloromethane**

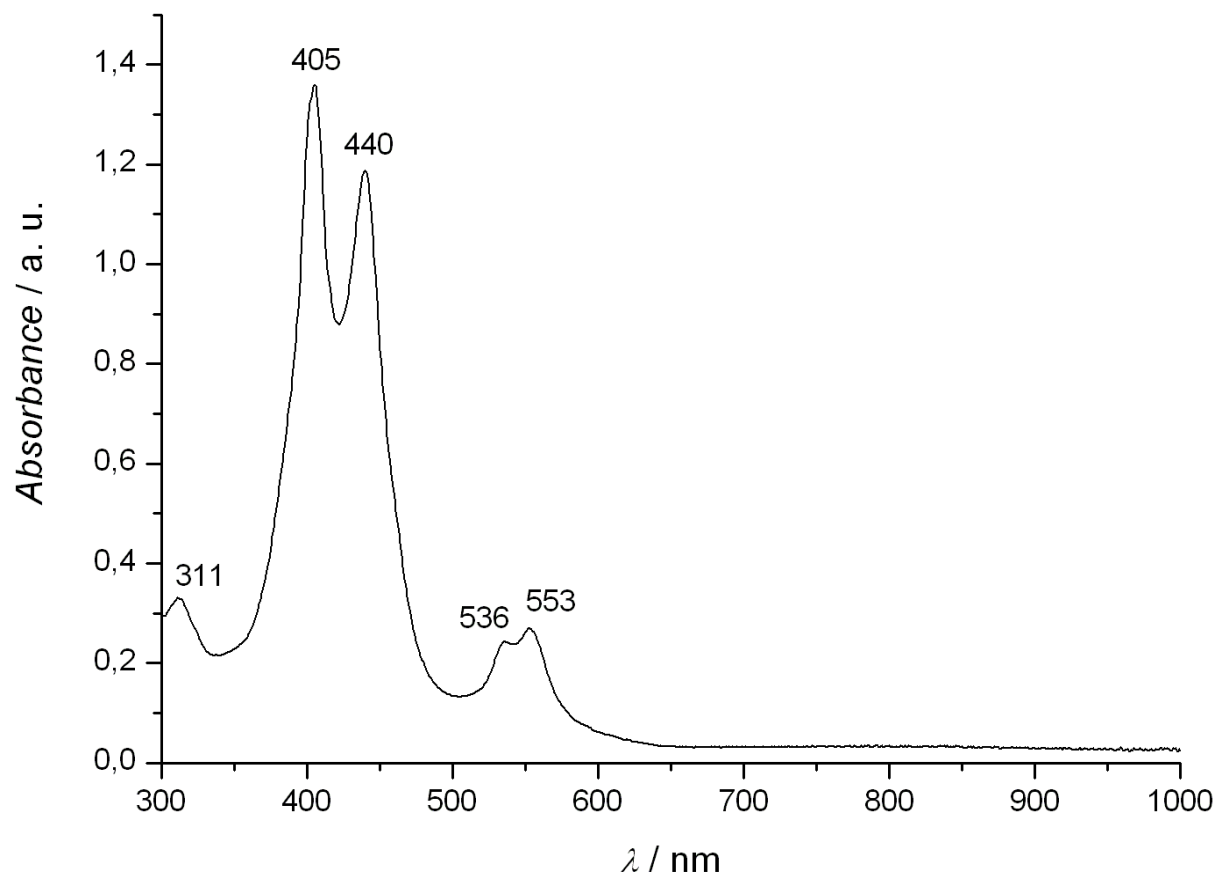

**S2: Maldi-Tof mass spectrometry characterisation measured on the sample issued from the UV-visible analysis**

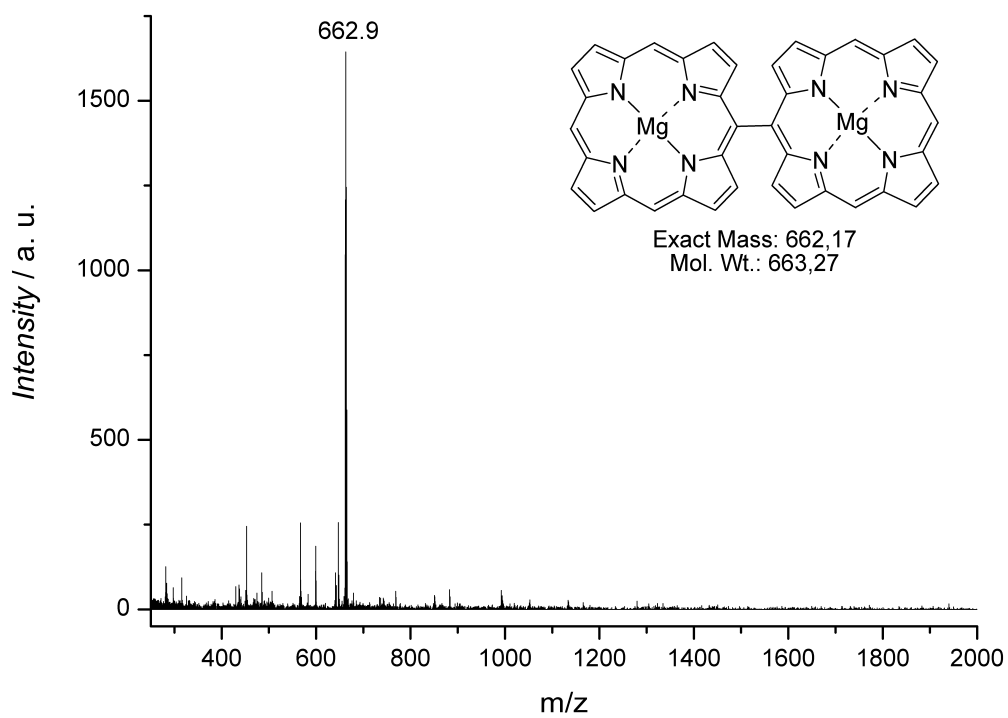

Supplement: b914916c.pdf [file b914916c.pdf]
